# Supplementary material for: CoxFe3−xO4 hierarchical nanocubes as peroxidase mimetics and their applications in H2O2 and glucose detection
Source: Royal Society of Chemistry journal article supplement (doi:10.1039/c4ra03859b), 2014-01-01
Supplement: c4ra03859b1.pdf [file c4ra03859b1.pdf]

## Supporting Information

### **Co<sub>x</sub>Fe<sub>3-x</sub>O<sub>4</sub> hierarchical nanocubes as peroxidase mimetics and their applications in H<sub>2</sub>O<sub>2</sub> and glucose detection**

Wenshu Yang<sup>a,b</sup>, Jinhui Hao<sup>a,b</sup>, Zhe Zhang<sup>a</sup>, Baoping Lu<sup>a,b</sup>,

Bailin Zhang<sup>\*a</sup> and Jilin Tang<sup>\*a</sup>

<sup>a</sup>State Key Laboratory of Electroanalytical Chemistry, Changchun Institute of Applied

Chemistry, Chinese Academy of Sciences, Changchun 130022, (P. R. China)

E-mail: blzhang@ciac.ac.cn; Fax: +86 431-85262430; Tel: +86 431-85262430

E-mail: jltang@ciac.ac.cn; Fax: +86 431-85262734; Tel: +86 431-85262734

<sup>b</sup>University of Chinese Academy of Sciences, Beijing 100039 (P.R. China)

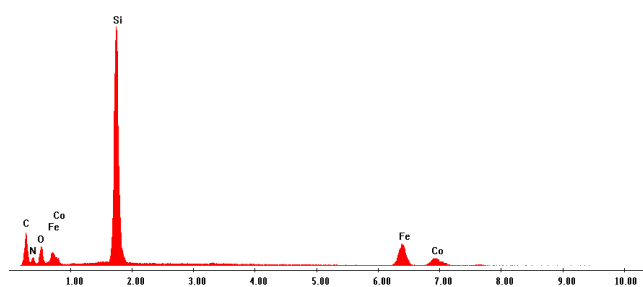

**Fig.S1** EDX spectrum of CF nanocubes, in which the Si signal is originated from the substrate.

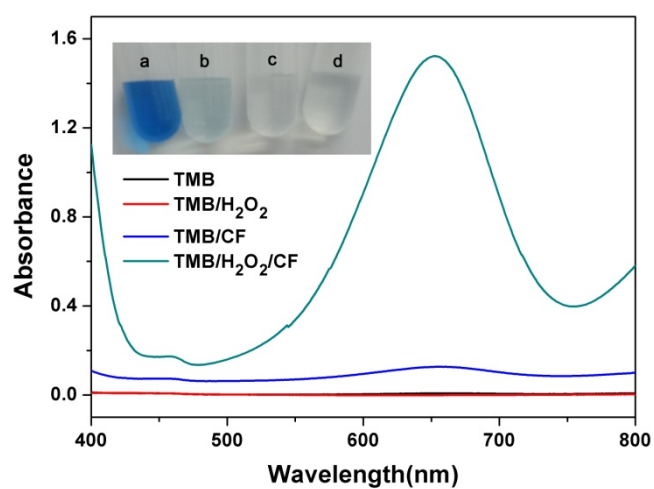

**Fig.S2** UV-Vis spectra of TMB solution (black line), TMB-H<sub>2</sub>O<sub>2</sub> (red line), TMB-CF solution (blue line) and TMB-H<sub>2</sub>O<sub>2</sub>-CF (green line) in pH 4.0 acetate buffer at room temperature. Inset: The optical photograph of aqueous solutions of TMB-H<sub>2</sub>O<sub>2</sub>-CF (a), TMB-CF (b), TMB-H<sub>2</sub>O<sub>2</sub> (c) and TMB (d).

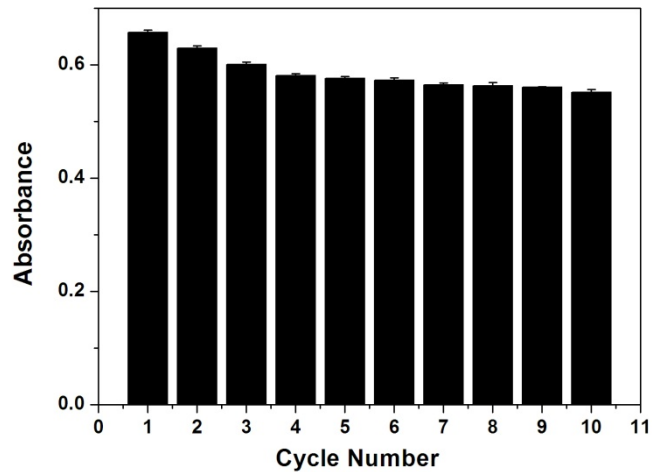

**Fig.S3** Reusability of the CF nanocubes.

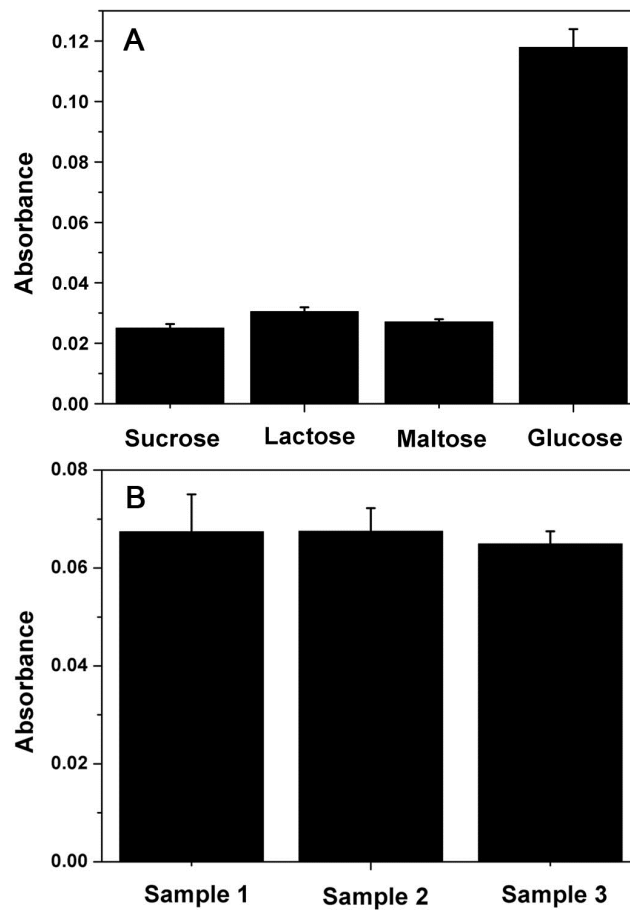

**Fig.S4** Selectivity analysis for glucose detection by using 5mM sucrose, 5mM lactose, 5mM maltose and 0.5mM glucose (A). Glucose detection in human serum samples (B).
